# Supplementary figures and images for: Medial entorhinal cortex activates in a traveling wave in the rat
Source: eLife journal article supplement (doi:10.7554/elife.52289), 2020-02-14

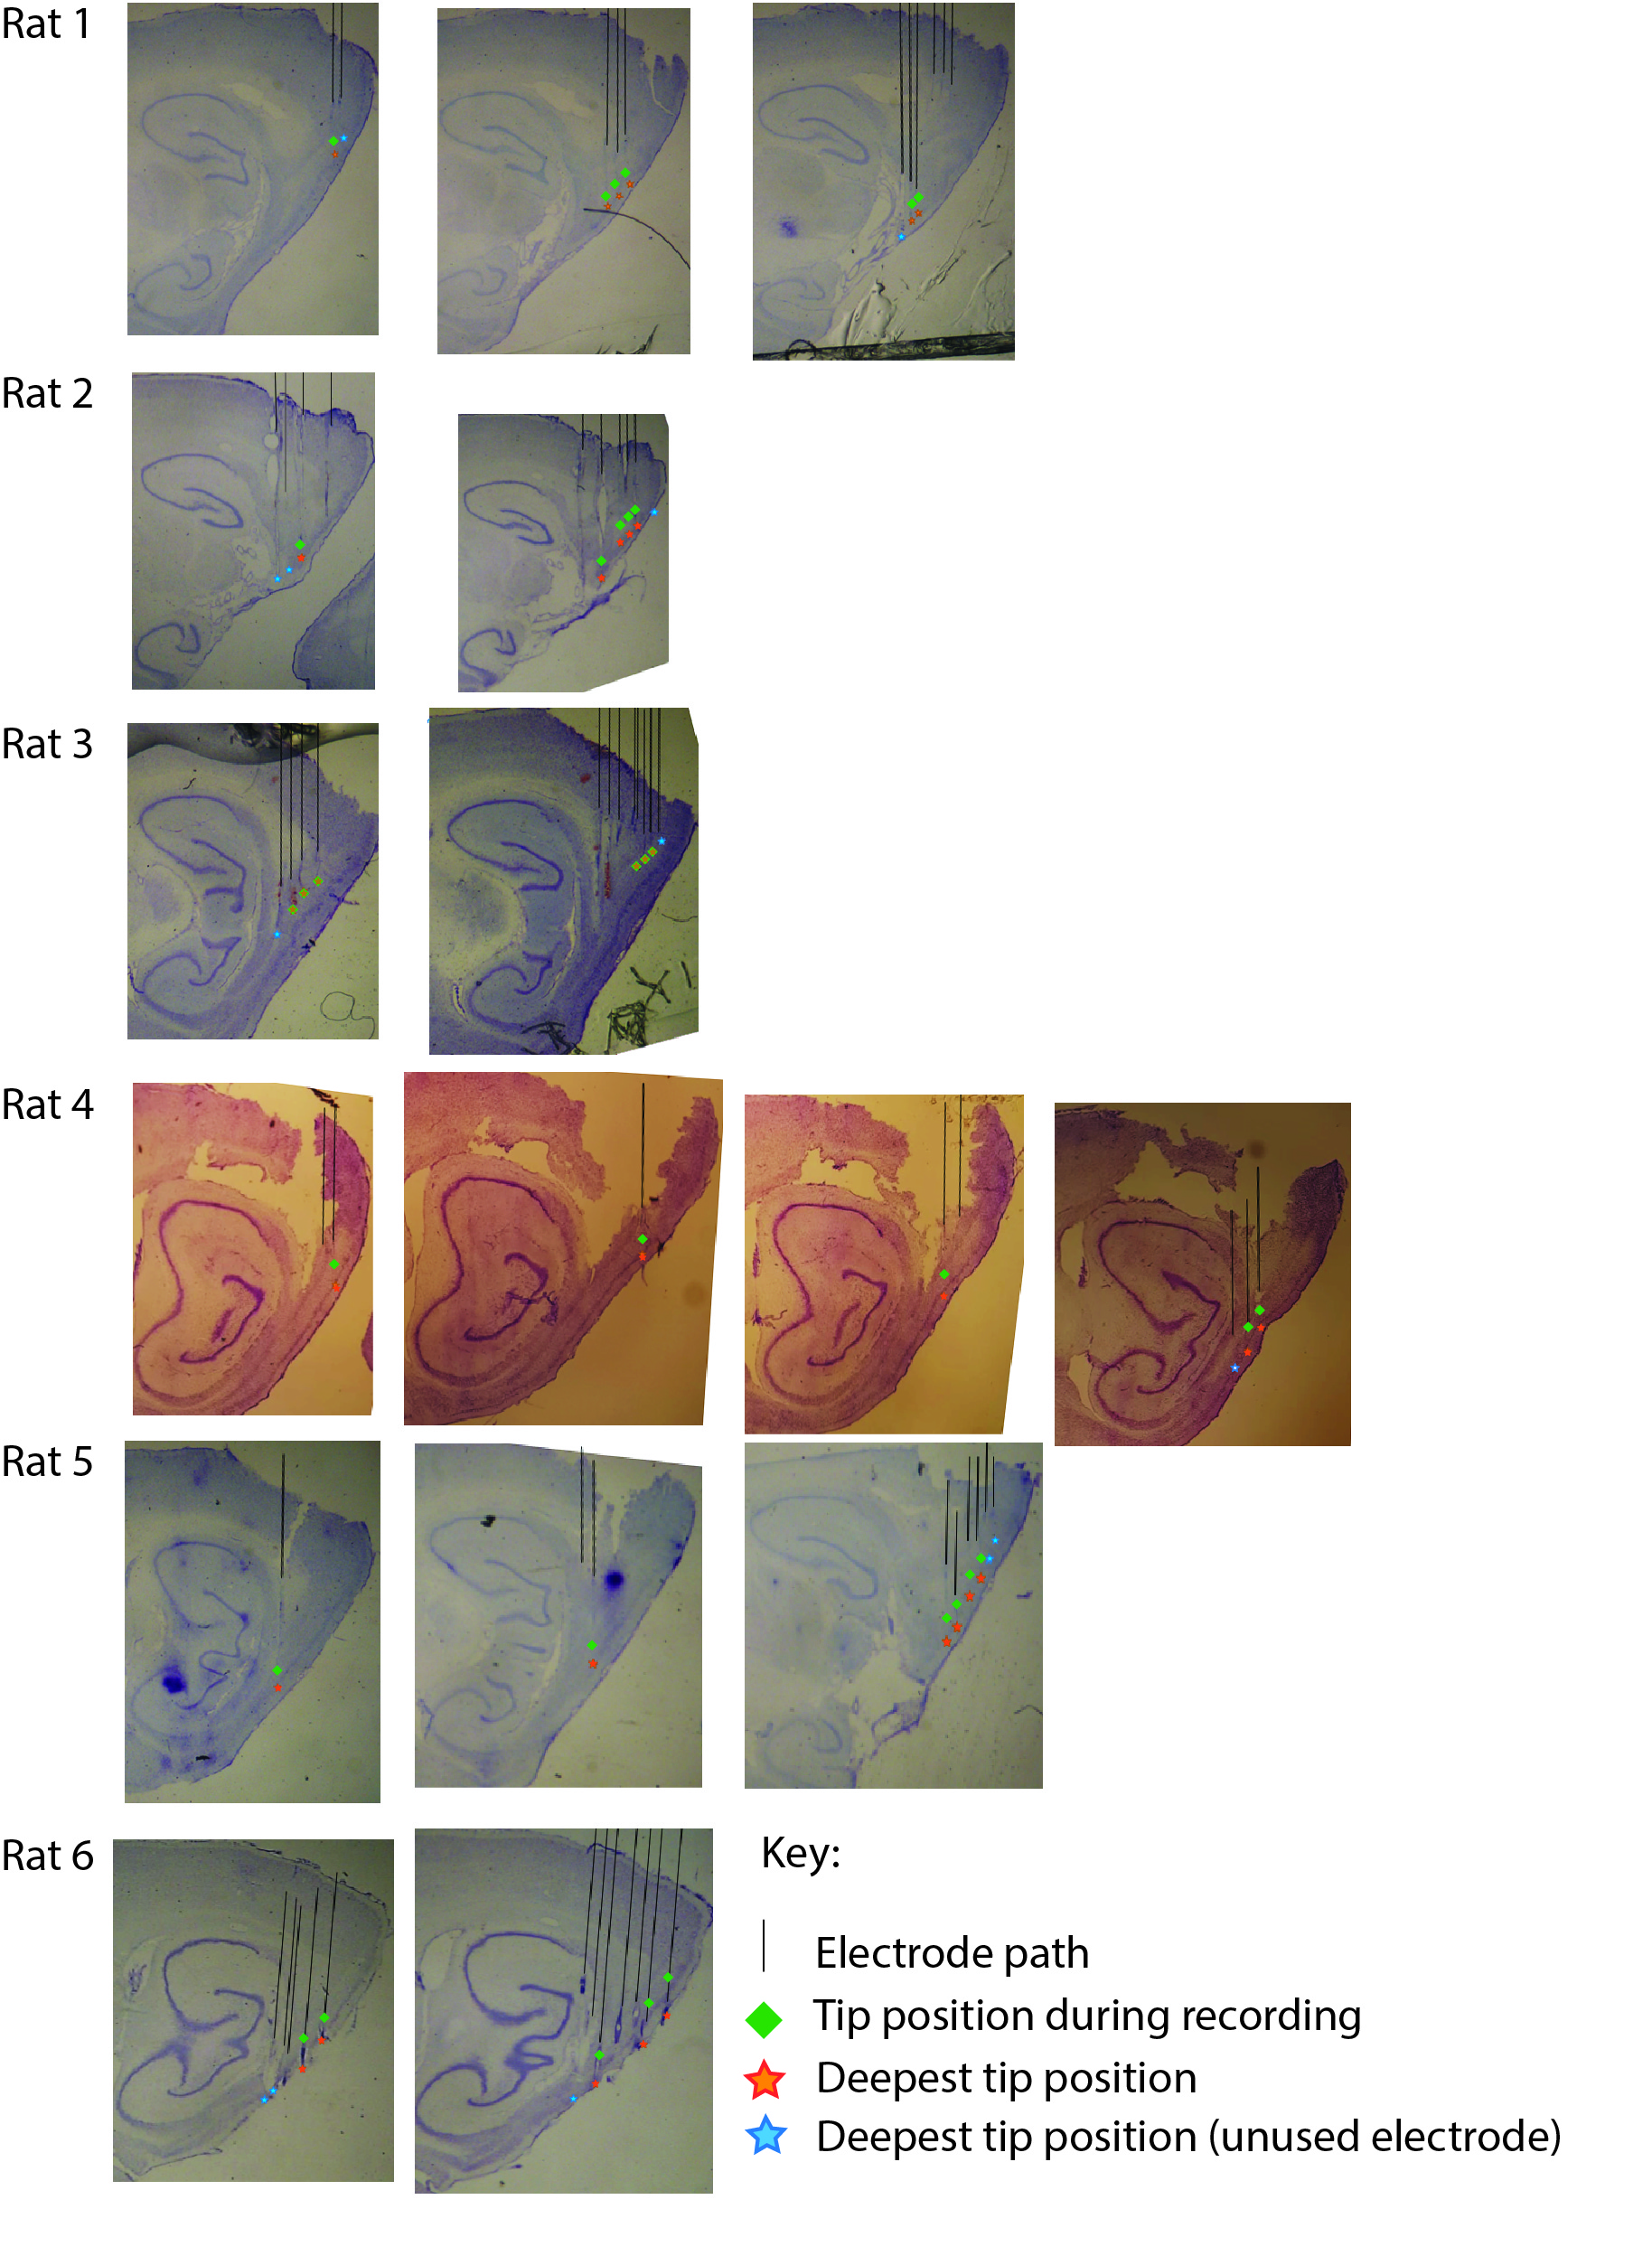

Supplement: supp [file elife-52289-supp-v1.zip › elife_poa_e52289_Figure_1_figure_supplement_1.jpg]
